# Supplementary material for: Suppressing vanadium dissolution of V2O5via in situ polyethylene glycol intercalation towards ultralong lifetime room/low-temperature zinc-ion batteries
Source: Royal Society of Chemistry journal article supplement (doi:10.1039/d1nr05334e), 2021-01-01
Supplement: d1nr05334e1.pdf [file d1nr05334e1.pdf]

**Suppressing vanadium dissolution of V<sub>2</sub>O<sub>5</sub> via in situ polyethylene glycol intercalation towards ultralong lifetime room/low-temperature zinc-ion batteries**

Chunfa Lin,<sup>a</sup> Fenqiang Qi,<sup>b</sup> Huilong Dong,<sup>a</sup> Xiao Li,<sup>a</sup> Chunping Shen,<sup>c</sup> Edison Huixiang Ang,<sup>d</sup> Yuqiang Han,<sup>a\*</sup> Hongbo Geng,<sup>a\*</sup> Cheng Chao Li<sup>e\*</sup>

<sup>a</sup>School of Materials Engineering, Changshu Institute of Technology, Changshu, Jiangsu, 215500, China

<sup>b</sup>College of Chemistry, Chemical Engineering and Materials Science, Soochow University, Suzhou 215123, China

<sup>c</sup>Jiangsu Tenpower Lithium Co., Ltd., Zhangjiagang, Jiangsu, China

<sup>d</sup>Natural Sciences and Science Education, National Institute of Education, Nanyang Technological University, Singapore, Singapore

<sup>e</sup>School of Chemical Engineering and Light Industry, Guangdong University of Technology, Guangzhou 510006, China

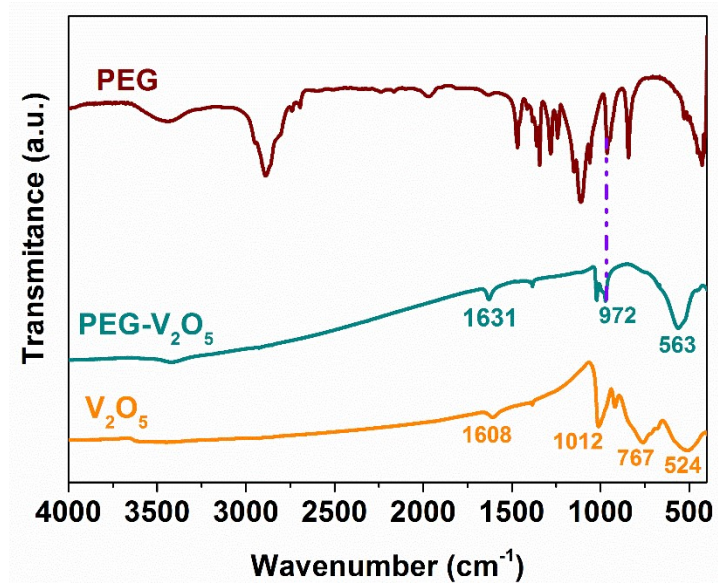

Figure S1. FTIR spectra of PEG, PEG- $\text{V}_2\text{O}_5$  and raw  $\text{V}_2\text{O}_5$ .

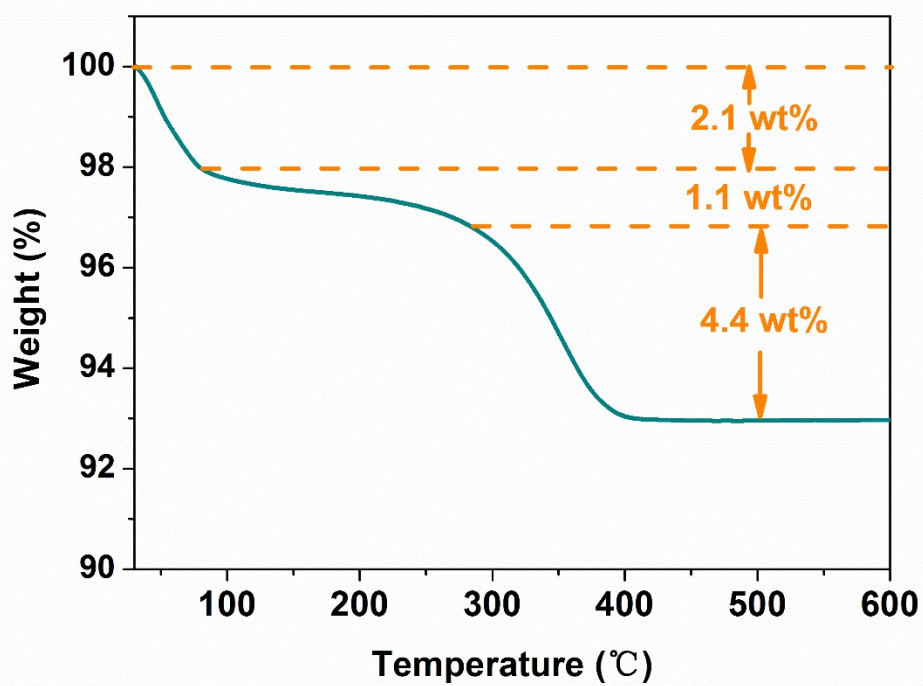

Figure S2. The TG curves of PEG- $\text{V}_2\text{O}_5$ .

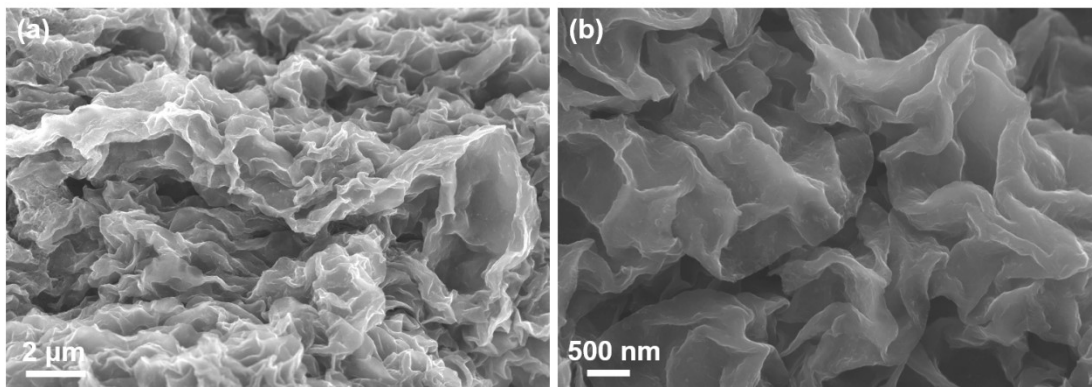

**Figure S3.** (a, b) SEM images of HVO.

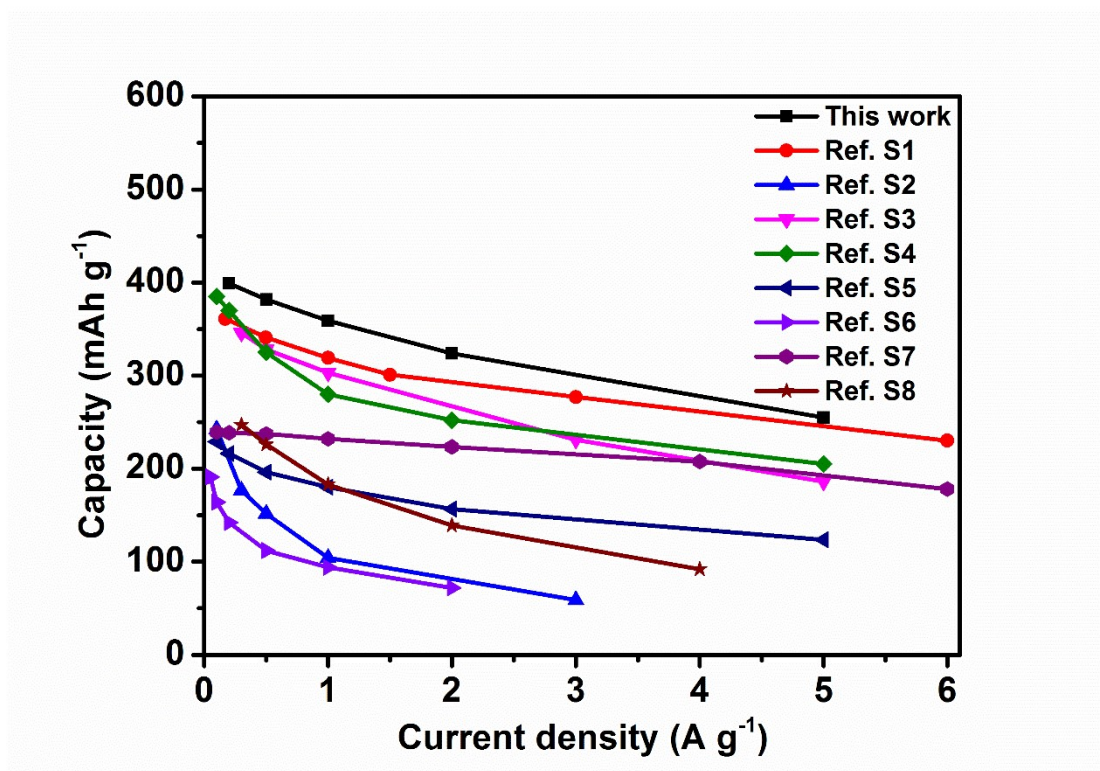

**Figure S4.** Comparison of the rate capability of the PEG-V<sub>2</sub>O<sub>5</sub> with other previously reported ZIBs cathodes.

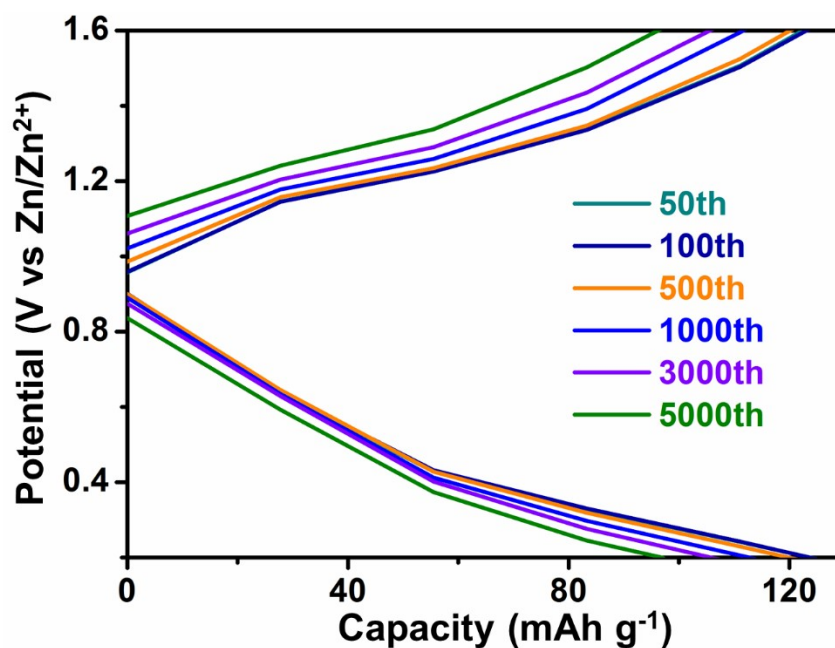

**Figure S5.** Galvanostatic charge-discharge profiles during different cycling numbers at 10.0 A g<sup>-1</sup>.

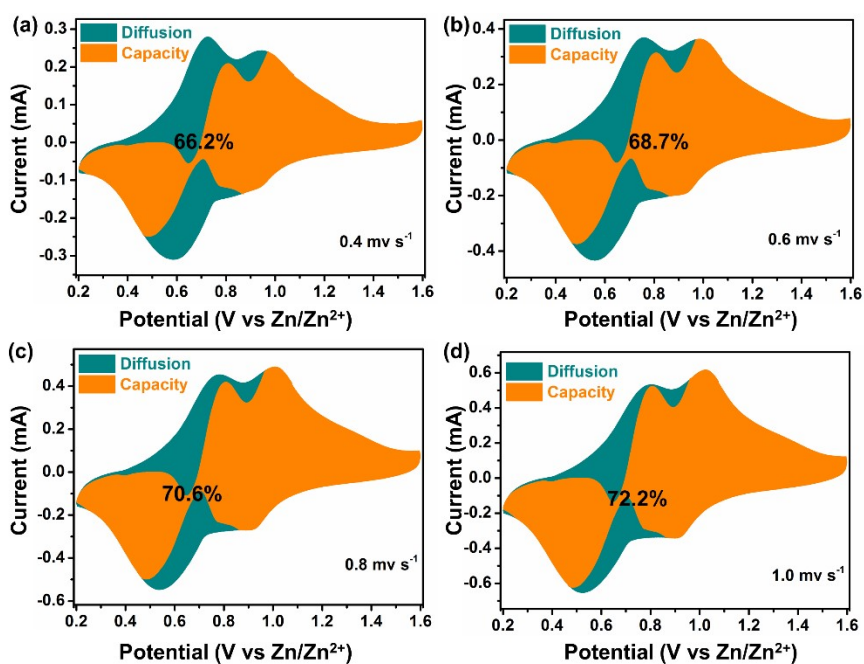

**Figure S6.** Separation of the capacitive and diffusion-controlled current contribution at different scan rates.

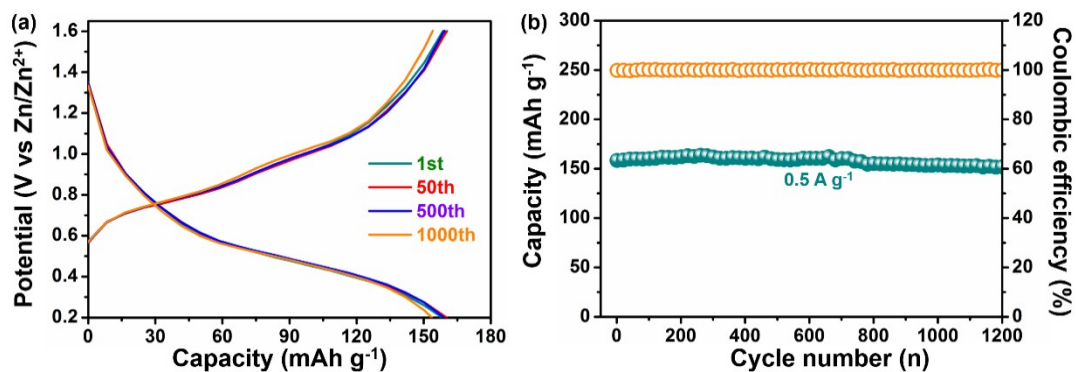

**Figure S7.** Zinc-ion storage performance of PEG-V<sub>2</sub>O<sub>5</sub> electrode at a low temperature of -10 °C: (a) The charge-discharge curves and (b) cycling performance at 0.5 A·g<sup>-1</sup>.

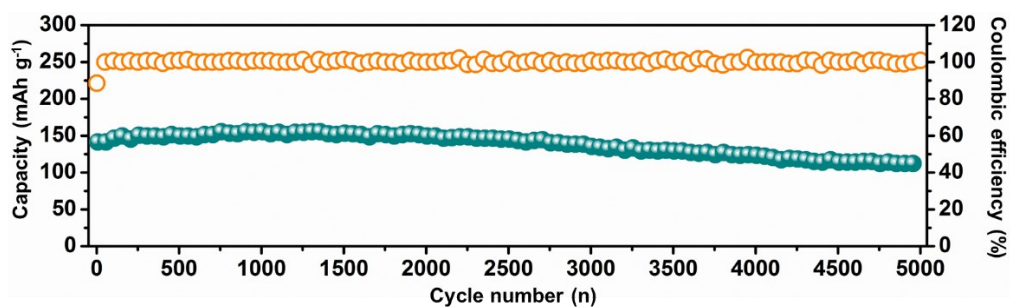

**Figure S8.** Long cycling performance of PEG-V<sub>2</sub>O<sub>5</sub> electrode at a low temperature of -10 °C at 2.0 A·g<sup>-1</sup>.

**Table S1.** Comparison of the diffusion coefficient ( $D_{Zn^{2+}}$ ) with other reported cathode materials.

| Cathode Materials                                                   | $D_{Zn^{2+}}$ ( $cm^2 s^{-1}$ ) | Ref.      |
|---------------------------------------------------------------------|---------------------------------|-----------|
| PEG-V <sub>2</sub> O <sub>5</sub>                                   | $10^{-9} \sim 10^{-11}$         | This work |
| Mn <sub>0.15</sub> V <sub>2</sub> O <sub>5</sub> •nH <sub>2</sub> O | $10^{-10} \sim 10^{-12}$        | [9]       |
| α-MnO <sub>2</sub>                                                  | $10^{-12} \sim 10^{-17}$        | [2]       |
| LiFePO <sub>4</sub>                                                 | $10^{-15} \sim 10^{-19}$        | [10]      |
| MnO <sub>2</sub> nanospheres                                        | $10^{-12} \sim 10^{-15}$        | [11]      |
| δ-MnO <sub>2</sub>                                                  | $10^{-12} \sim 10^{-15}$        | [12]      |
| PANI-VOH                                                            | $10^{-13} \sim 10^{-16}$        | [3]       |
| Al <sub>0.2</sub> V <sub>2</sub> O <sub>5</sub>                     | $10^{-12} \sim 10^{-13}$        | [13]      |

#### References:

- S1.** V. Soundharrajan, B. Sambandam, S. Kim, M.H. Alfaruqi, D.Y. Putro, J. Jo, S. Kim, V. Mathew, Y.K. Sun and J. Kim, *Nano Lett.*, 2018, **18**, 2402-2410.
- S2.** B. Wu, G. Zhang, M. Yan, T. Xiong, P. He, L. He, X. Xu and L. Mai, *Small*, 2018, **14**, 1703850.
- S3.** M. Wang, J. Zhang, L. Zhang, J. Li, W. Wang, Z. Yang, L. Zhang, Y. Wang, J. Chen, Y. Huang, D. Mitlin and X. Li, *ACS Appl. Mater. Interfaces*, 2020, **12**, 31564-31574.
- S4.** F. Wan, S. Huang, H. Cao and Z. Niu, *ACS Nano*, 2020, **14**, 6752-6760.
- S5.** T. Wei, Q. Li, G. Yang, C. Wang, *J. Mater. Chem. A*, 2018, **6**, 20402-20410.
- S6.** Y. Cai, F. Liu, Z. Luo, G. Fang, J. Zhou, A. Pan and S. Liang, *Energy Storage Mater.*, 2018, **13**, 168-174.
- S7.** B. Sambandam, V. Soundharrajan, S. Kim, M.H. Alfaruqi, J. Jo, S. Kim, V.

- Mathew, Y.K. Sun and J. Kim, *J. Mater. Chem. A*, 2018, **6**, 15530-15539.
- S8.** B. Tang, G. Fang, J. Zhou, L. Wang, Y. Lei, C. Wang, T. Lin, Y. Tang and S. Liang, *Nano Energy*, 2018, **51**, 579-587.
- S9.** H. Geng, M. Cheng, B. Wang, Y. Yang, Y. Zhang and C.C. Li, *Adv. Funct. Mater.*, 2019, **30**, 1907684.
- S10.** K. Tang, X. Yu, J. Sun, H. Li and X. Huang, *Electrochim. Acta*, 2011, **56**, 4869-4875.
- S11.** J. Wang, J.-G. Wang, H. Liu, C. Wei and F. Kang, *J. Mater. Chem. A*, 2019, **7**, 13727-13735.
- S12.** C. Guo, H. Liu, J. Li, Z. Hou, J. Liang, J. Zhou, Y. Zhu and Y. Qian, *Electrochim. Acta*, 2019, **304**, 370-377.
- S13.** Q. Pang, W. He, X. Yu, S. Yang, H. Zhao, Y. Fu, M. Xing, Y. Tian, X. Luo and Y. Wei, *Appl. Surf. Sci.*, 2021, **538**, 148043.
